# Supplementary material for: Assembly of 3D flower-like NiO hierarchical architectures by 2D nanosheets: synthesis and their sensing properties to formaldehyde
Source: Royal Society of Chemistry journal article supplement (doi:10.1039/c6ra25883b), 2017-01-01
Supplement: c6ra25883b1.pdf [file c6ra25883b1.pdf]

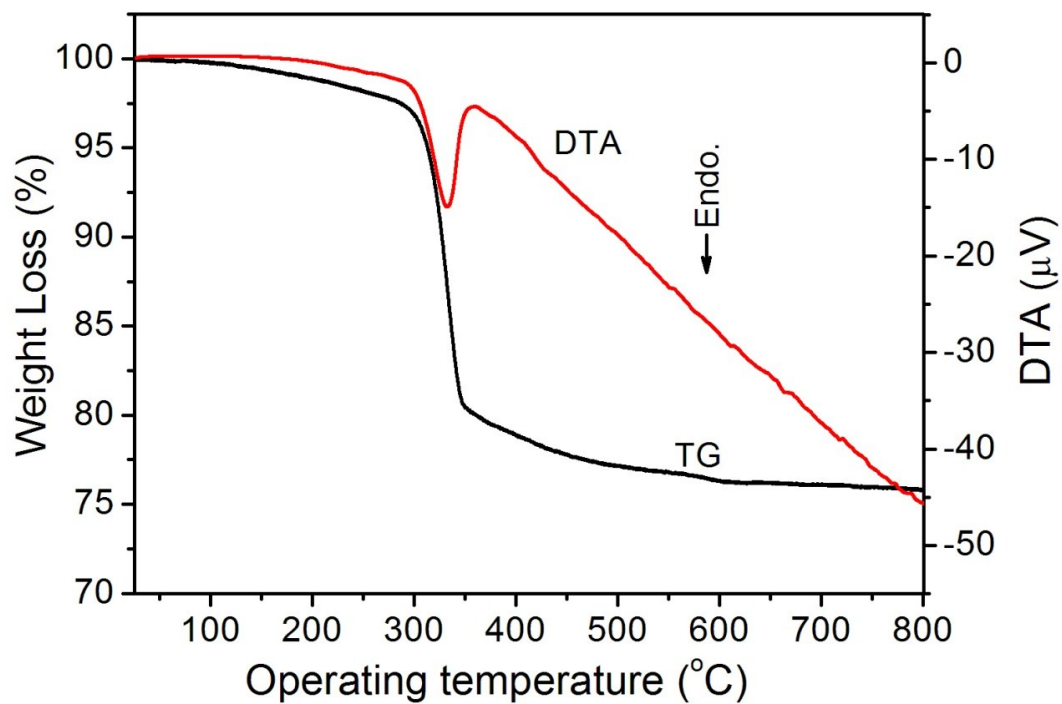

Fig. S1 TGA curve of the as-obtained product synthesized at ethanol/water volume ratio of 30/10.

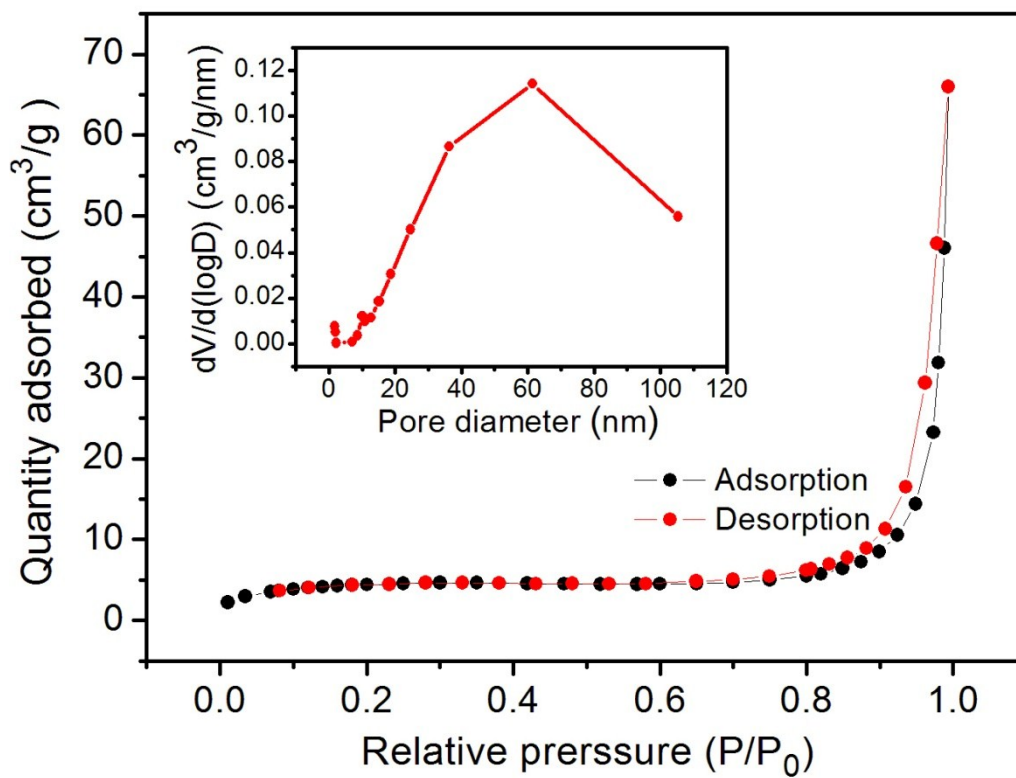

Fig. S2 Nitrogen adsorption-desorption measurement isotherm and the corresponding pore size distribution (inset) of the annealed product synthesized at ethanol/water volume ratio of 30/10

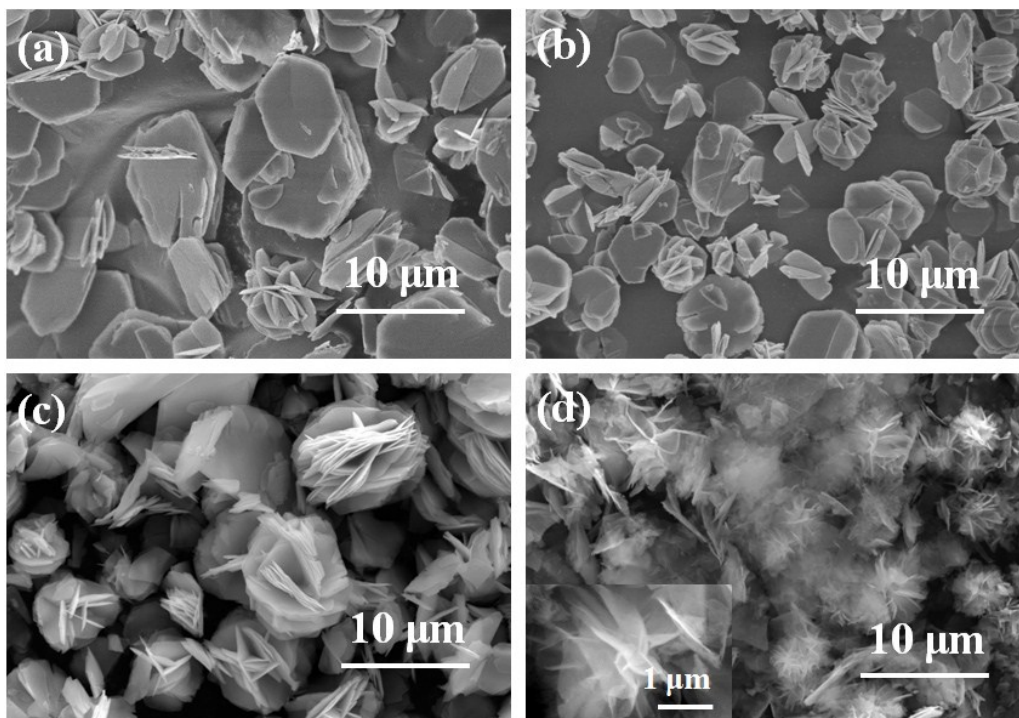

Fig. S3 FESEM images of the annealed products synthesized at different ethanol/water volume ratio: (a) 10/30, (b) 20/20, (c) 30/10, and (d) 40/0 (pure ethanol).
